# Supplementary material
Source: ML conference proceedings conference paper supplement (https://openreview.net/forum?id=hOVEBHpHrMu)
Supplement: supplementary_material [file attachment]

## 1 A. Overview

2 In this document, we explain more details to the main paper and provide more ablation experiments  
3 on hyperparameters.

4 In Section B., we describe the implementation of sparse operation (Section 3.1). In Section C., we  
5 provide more details of our network architecture (Section 4.1). In Section D., we conduct ablation  
6 studies on some critical hyperparameters to prove the effectiveness of the model design. In Section E.,  
7 we provide more visualization results on Waymo [2].

## 8 B. Sparse Operation

9 In this section, we describe in detail how to implement window-based attention on sparse voxels.

10 **Hash Table Establishment** Given the input sparse voxel  $\mathcal{V} = \{v_i | v_i = (x_i, f_i)\}_{i=1}^{|\mathcal{V}|}$ , we first  
11 build a hash table for convenient voxel searching. The key of hash table is the flattened voxel  
12 coordinate  $bx_{max}y_{max}z_{max} + xy_{max}z_{max} + yz_{max} + z$  while the value stores the voxel features,  
13 where  $b, x, y, z$  denote batch index and voxel coordinates, and  $x_{max}, y_{max}, z_{max}$  are the max range  
14 of voxel space. The hash function adopts the modulus strategy, and utilizes the linear probing method  
15 to find the empty address when hash collision occurs. In this way, we can only reserve the non-empty  
16 voxels, and establish the connection between voxel coordinates and their features. Once a voxel  
17 coordinate is given, we can rapidly check whether it is empty and extract the feature data according  
18 to the coordinate for non-empty location. It is worth noting that the hash table can be processed by  
19 CUDA in parallel so that the voxel searching process can be further accelerated.

20 **Sparse Window Partition** In Section 3.1.1, we partition the voxels into non-overlap 3D windows  
21 according to window size  $s_0$  and obtain their window centers  $\{c_i | c_i \in \mathbb{Z}^3\}_{i=0}^L$  as:

$$c_i = (\lfloor x_i/s_0 \rfloor + 0.5) \times s_0, \quad (1)$$

22 Note that we further merge the repeated centers and generate a unique set of centers to save computa-  
23 tion cost.

24 **Voxel Gathering** With ready of the window centers, we further search for non-empty voxels around  
25 the centers within the query or key windows. Benefit from the pre-built hash table, the voxel searching  
26 process can be converted to finding the existing hash keys via the hash function. In this way, we  
27 first get the non-empty voxel coordinates within all non-empty windows then leverage balanced  
28 multi-window sampling to obtain the final sampled voxel coordinates. Finally we can quickly gather  
29 the voxel features from the hash table with the sampled voxel coordinates. These voxel coordinates as  
30 well as their features are then fed to the attention mechanism as mentioned in the main paper (Section  
31 3.1.2).

## 32 C. More Architectural Details

33 Following the classic 3D detection paradigm in OpenPCDet [3], our single-stage network consists  
34 of a VFE layer, a 3D backbone, a 2D backbone and a detection head. We also add a ROI head  
35 implemented by CT3D [1] on our single-stage architecture to build the two-stage network. In Section  
36 4.1, we elaborate 3D backbone and detection head, and now we will detail the implementation of  
37 VFE layer and 2D backbone.

38 **VFE.** We apply the dynamic VFE [5] to convert  $N$  irregular points into  $L$  voxels with 128 channels,  
39 since it can reduce the information loss caused by voxelization. For the original point cloud in each  
40 voxel, we obtain the feature  $P_0 \in \mathbb{R}^{N \times (C_0 + 6)}$  by concatenating the relative coordinates offset to  
41 voxel centers and cluster centers with the original channels  $C_0$ . After that, the features are transformed  
42 into  $F_1 \in \mathbb{R}^{N \times 64}$  through linear projection as:

$$P_1 = \text{MLP}(P_0). \quad (2)$$

43 Then we compute the average of features in each voxel and cat it back to all points within the voxel  
44 as:

$$F_1 = \text{Average}(P_1), \quad (3)$$

Table 1: Ablations on grouping setup.  $s_1$  represents the key window of  $3 \times 3 \times 5$  and  $s_2$  represents the key window of  $7 \times 7 \times 7$ .

| Group         | Veh / Ped / Cyc   |
|---------------|-------------------|
| $8s_1$        | 71.26/74.19/65.35 |
| $6s_1 + 2s_2$ | 71.96/75.65/67.65 |
| $4s_1 + 4s_2$ | 72.37/75.99/67.90 |
| $2s_1 + 6s_2$ | 72.23/75.81/68.08 |
| $8s_2$        | 72.06/74.40/66.73 |

Table 2: Ablations on window size setup.  $s_1$  represents the size of query window and the inner key window.  $s_2$  represents the size of query window and the outer key window. "3,3,5", "7,7,7" and other numbers represent the window size alone  $xyz$  axes.

| Window Size                       | Veh / Ped / Cyc   |
|-----------------------------------|-------------------|
| $s_1 = 3, 3, 5, s_2 = 7, 7, 7$    | 72.37/75.99/67.90 |
| $s_1 = 5, 5, 5, s_2 = 9, 9, 9$    | 72.04/75.37/67.75 |
| $s_1 = 7, 7, 5, s_2 = 11, 11, 10$ | 70.48/73.84/65.71 |

45

$$P_2 = \text{Concat}(P_1, F_1), \quad (4)$$

46 where  $F_1 \in \mathbb{R}^{L \times 64}$ , and  $P_2 \in \mathbb{R}^{N \times 128}$ . A new linear layer is used to transform the features into  
 47  $P_3 \in \mathbb{R}^{N \times 128}$  and finally we can obtain the voxelwise encoded features  $F_2 \in \mathbb{R}^{L \times 128}$  through  
 48 another average pooling operation:

$$P_3 = \text{MLP}(P_2), \quad (5)$$

49

$$F_2 = \text{Average}(P_3). \quad (6)$$

50 **2D Backbone.** Following the implementation of SECOND [4] on OpenPCDet, the input 2D BEV  
 51 features go through six 2D convolution layers at the original resolution and another six 2D convolution  
 52 layers at 1/2 resolution, then are upsampled to the original resolution by the trans-convolution layers  
 53 to obtain the final output.

## 54 D. Ablation experiments of hyperparameters

55 We conduct a series of ablation experiments for the important hyperparameters in MsSVT and report  
 56 the L1 mAP for three categories. All ablation experiments used 20% waymo data and were trained  
 57 for 12 epochs.

58 **Effect of Window Grouping.** In Table 1, we study the impact of different window head grouping  
 59 settings. Note that the size of the query window is always 3, 3, 5. Generally, our model is robust  
 60 to different window head grouping settings, except for  $8s_1$  and  $8s_2$ , our model degenerates into a  
 61 single-scale model in this case, which causes the decline of the performance.

62 **Effect of Window Size.** We investigate the effects of window size in Table 2. It can be seen that  
 63 too large window size will lead to performance degradation. This may be because the key voxels are  
 64 too sparse in a large window. A possible solution is to increase the number of sampled key voxels,

Table 3: Ablations on number of blocks.

| Blocks | Veh / Ped / Cyc   | Mem(G) | Lat(ms) |
|--------|-------------------|--------|---------|
| 2      | 71.79/74.66/66.36 | 8.3    | 91      |
| 3      | 72.06/75.24/66.41 | 10.2   | 103     |
| 4      | 72.37/75.99/67.90 | 12.2   | 121     |
| 5      | 72.69/75.74/66.88 | 14.1   | 145     |

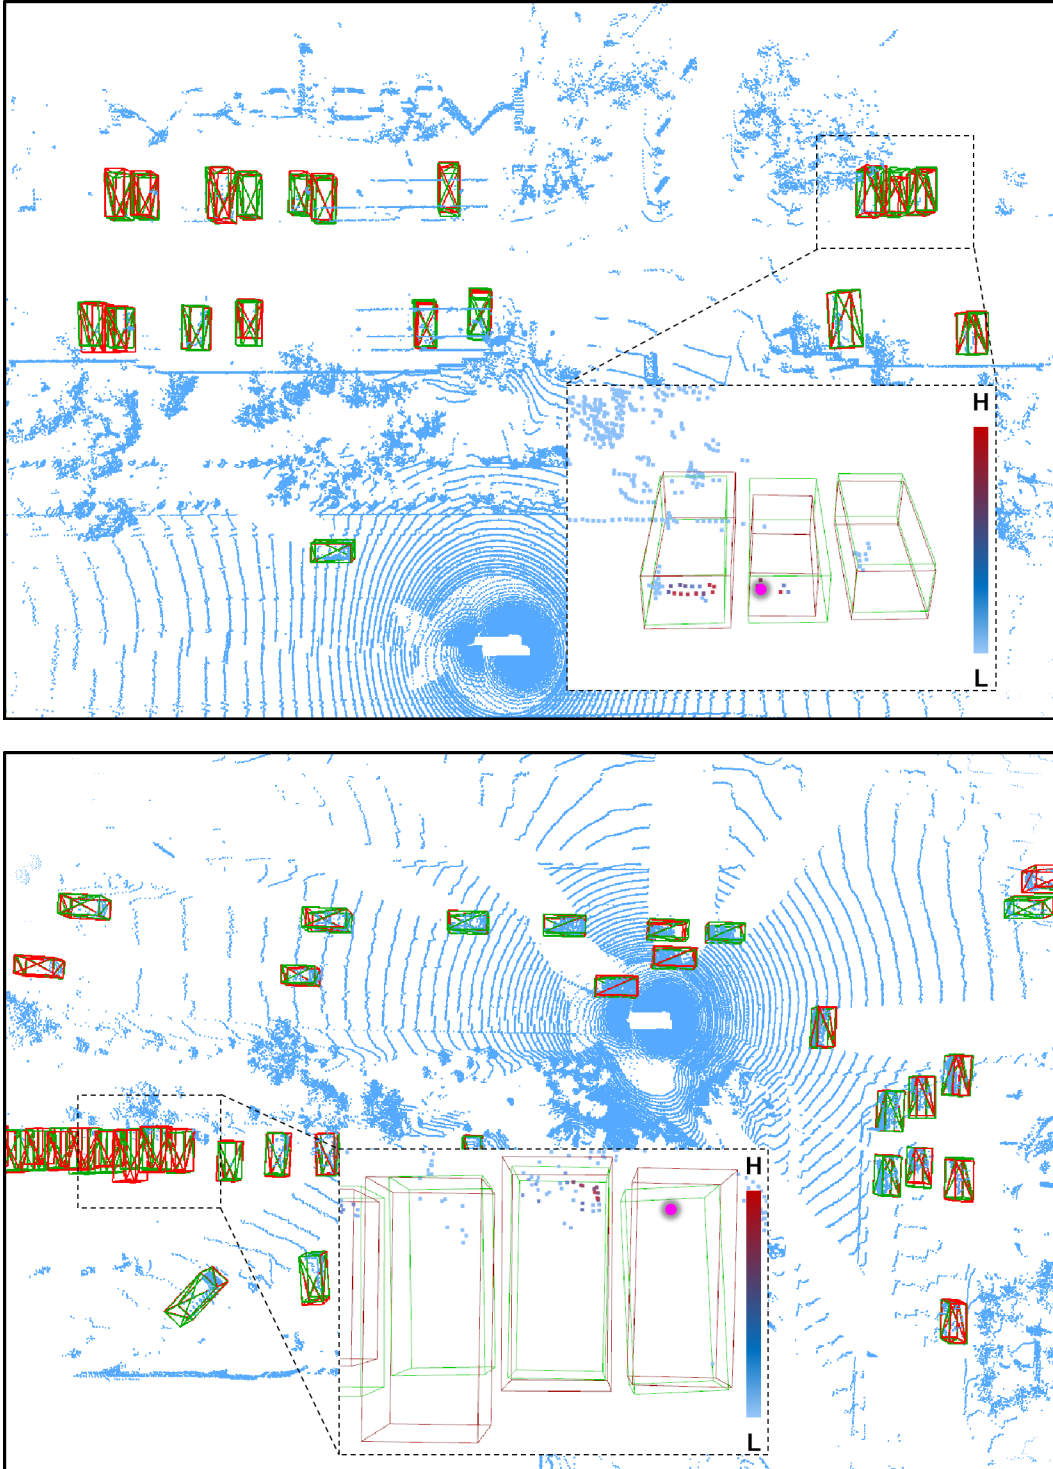

Figure 1: More visualization results on Waymo. The red and green boxes denote ground-truth and prediction, respectively. The pink dots represent query positions. The attention weight is reflected in the color of the point.

65 which however causes a huge computing cost and can not be adopted in implementation. Therefore,  
66 we select  $s_1 = 3, 3, 5$ ,  $s_2 = 7, 7, 7$  for our model.

67 **Effect of Block Number.** Table 3 shows the effect of different block numbers. Generally, our  
68 model is robust to the number of blocks. More blocks lead to the improvement of vehicle category,  
69 while other categories rise first then fall. Notably, more blocks can bring larger receptive field and  
70 help to extract higher-level semantic information, which is beneficial to the larger objects. To make a  
71 trade off between efficiency and performance, we finally use 4 blocks in our MsSVT by default.

## 72 E. More Visualization

73 We show more visualization results of our prediction bounding boxes and the attention weights  
74 in Fig. 1. It can be seen that most of the objects in Fig. 1 are accurately detected. Some "hard"  
75 bounding boxes are indicated with dotted rectangles, i.e., only 1~5 points are in the boxes. These  
76 boxes are still correctly regressed and even have a high confidence score of more than 0.5. By  
77 visualizing the attention weight, we find that in these hard cases, the few points left in the bounding  
78 boxes pay more attention to their surrounding objects to search for more information as the points  
79 within boxes themselves are too sparse to provide confident information, which demonstrates that  
80 MsSVT can gather a long range of contextual information to infer the location and size of the box  
81 when the fine-grained details are missing. A representative example is shown in Fig. 1: in a row of  
82 side-by-side vehicles, even if one of the vehicles is covered by very few points, its bounding box can  
83 still be predicted by understanding the scene semantics and analysing the locations and sizes of the  
84 surrounding vehicles.

## 85 References

- 86 [1] Hualian Sheng, Sijia Cai, Yuan Liu, Bing Deng, Jianqiang Huang, Xian-Sheng Hua, and Min-Jian  
87 Zhao. Improving 3d object detection with channel-wise transformer. In *ICCV*, 2021.
- 88 [2] Pei Sun, Henrik Kretzschmar, Xerxes Dotiwalla, Aurelien Chouard, Vijaysai Patnaik, Paul  
89 Tsui, James Guo, Yin Zhou, Yuning Chai, Benjamin Caine, et al. Scalability in perception for  
90 autonomous driving: Waymo open dataset. In *CVPR*, 2020.
- 91 [3] OpenPCDet Development Team. Openpcdet: An open-source toolbox for 3d object detection  
92 from point clouds. <https://github.com/open-mmlab/OpenPCDet>, 2020.
- 93 [4] Yan Yan, Yuxing Mao, and Bo Li. Second: Sparsely embedded convolutional detection. *Sensors*,  
94 18(10):3337, 2018.
- 95 [5] Yin Zhou, Pei Sun, Yu Zhang, Dragomir Anguelov, Jiyang Gao, Tom Ouyang, James Guo, Jiquan  
96 Ngiam, and Vijay Vasudevan. End-to-end multi-view fusion for 3d object detection in lidar point  
97 clouds. In *Conference on Robot Learning*, pages 923–932. PMLR, 2020.
